# Supplementary material for: A full visible LED enabled by a broadband yellow emission nepheline phosphor derived from a europium doped SOD zeolite
Source: Royal Society of Chemistry journal article supplement (doi:10.1039/d2tc02732a), 2022-01-01
Supplement: d2tc02732a1.pdf [file d2tc02732a1.pdf]

# Supporting Information

## **Full Visible LED Enabled by the Broadband Yellow Emission Nepheline Phosphor Derived from Europium Doped SOD Zeolite**

*Xinzhe Zhou, Tiezhen Ren, Jian Yin, Xiurong Zhang, Peng Li\* and Huanrong Li\**

X. Zhou, Prof. P. Li, Prof. H. Li

Tianjin Key Laboratory of Chemical Process Safety, School of Chemical Engineering and Technology, Hebei University of Technology, GuangRong Dao 8, Hongqiao District, Tianjin 300130, P. R. China.

E-mail: [lipeng@hebut.edu.cn](mailto:lipeng@hebut.edu.cn); [lihuanrong@hebut.edu.cn](mailto:lihuanrong@hebut.edu.cn)

Prof. T. Ren

College of Chemical Engineering, Xinjiang University, Urumqi, Xinjiang, 830046  
China

Dr. J. Yin, X. Zhang

Tianjin Baogang Research Institute of Rare Earths Co., Ltd., Tianjin 300300, China

**Table S1.** Crystallographic data, structure refinement parameters of Eu<sup>2+</sup>-SOD-x (x = 700, 800, 900, 1000, 1100, 1200, 1300) phosphors.

|                  | Eu <sup>2+</sup> -SOD-<br>700   | Eu <sup>2+</sup> -SOD-<br>800   | Eu <sup>2+</sup> -SOD-<br>900 | Eu <sup>2+</sup> -SOD-<br>1000 | Eu <sup>2+</sup> -SOD-<br>1100 | Eu <sup>2+</sup> -SOD-<br>1200 | Eu <sup>2+</sup> -SOD-<br>1300 |
|------------------|---------------------------------|---------------------------------|-------------------------------|--------------------------------|--------------------------------|--------------------------------|--------------------------------|
| Unit cell        | a=8.88689<br>Å                  | a=8.88689<br>Å                  | a=10.01000<br>Å               | a=10.01000<br>Å                | a=10.01000<br>Å                | a=10.01000<br>Å                | a=10.01000<br>Å                |
|                  | b=8.88689<br>Å                  | b=8.88689<br>Å                  | b=10.01000<br>Å               | b=10.01000<br>Å                | b=10.01000<br>Å                | b=10.01000<br>Å                | b=10.01000<br>Å                |
|                  | c=8.88689<br>Å                  | c=8.88689<br>Å                  | c=8.40500<br>Å                | c=8.40500<br>Å                 | c=8.40500<br>Å                 | c=8.40500<br>Å                 | c=8.40500<br>Å                 |
| Cell volume      | V=701.858<br>355 Å <sup>3</sup> | V=701.858<br>355 Å <sup>3</sup> | V=729.350<br>9 Å <sup>3</sup> | V=729.350<br>9 Å <sup>3</sup>  | V=729.350<br>9 Å <sup>3</sup>  | V=729.350<br>9 Å <sup>3</sup>  | V=729.350<br>9 Å <sup>3</sup>  |
| Space group      | P-43n (218)                     | P-43n (218)                     | P-63 (173)                    | P-63 (173)                     | P-63 (173)                     | P-63 (173)                     | P-63 (173)                     |
| R <sub>exp</sub> | 2.47 %                          | 0.47%                           | 12.11%                        | 13.42%                         | 10.14%                         | 14.79%                         | 14.47%                         |
| R <sub>wp</sub>  | 0.97%                           | 0.29%                           | 6.34%                         | 4.18%                          | 5.36%                          | 0.77%                          | 0.87%                          |
| χ <sup>2</sup>   | 0.66                            | 0.43                            | 0.63                          | 1.58                           | 0.34                           | 0.38                           | 0.79                           |

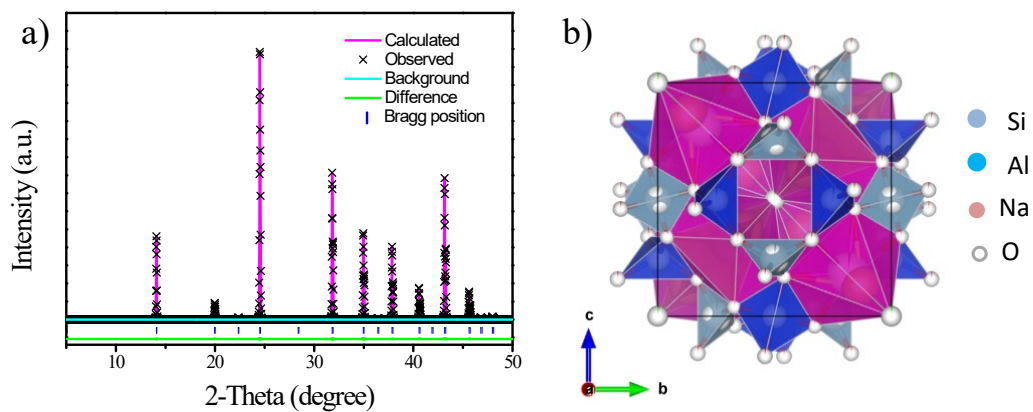

Figure S1. (a) XRD profile for Rietveld refinement of  $\text{Eu}^{2+}$ -SOD-700 phosphor. (b) Schematic crystal structure of  $\text{Eu}^{2+}$ -SOD-700 phosphor.

Table S2. Fractional Atomic Coordinates of Eu<sup>2+</sup>-SOD-700 phosphor.

| Atom | Site | x         | y         | Z         |
|------|------|-----------|-----------|-----------|
| Na   | 8e   | -0.574175 | -0.574175 | -0.574175 |
| Al   | 6d   | 0.25000   | 0.00000   | 0.50000   |
| Si   | 6c   | 0.25000   | 0.50000   | 0.00000   |
| O1   | 24i  | 0.17163   | 0.15894   | 0.45912   |
| O2   | 2a   | 0.00000   | 0.00000   | 0.00000   |
| Eu   | 8e   | -0.574175 | -0.574175 | -0.574175 |

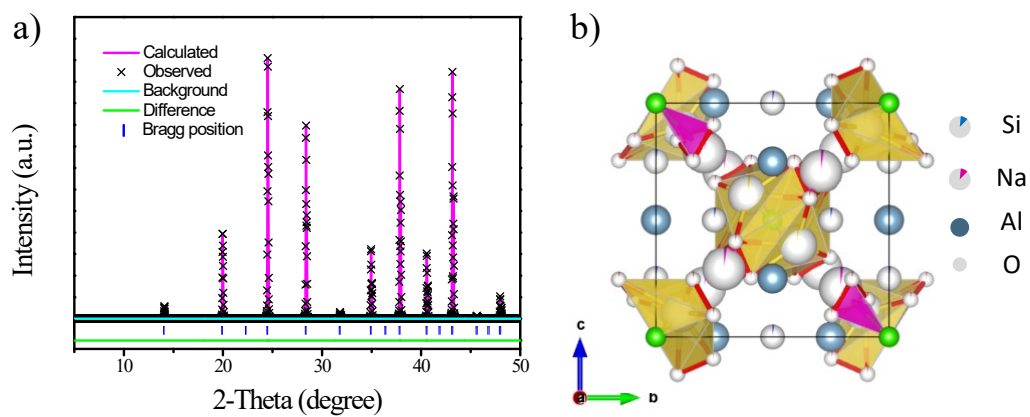

Figure S2. (a) XRD profile for Rietveld refinement of Eu<sup>2+</sup>-SOD-800 phosphor. (b) Schematic crystal structure of Eu<sup>2+</sup>-SOD-800 phosphor.

Table S3. Fractional Atomic Coordinates of Eu<sup>2+</sup>-SOD-800 phosphor.

| Atom | Site | x        | y       | z        |
|------|------|----------|---------|----------|
| Na   | 8e   | 2.89449  | 2.89449 | 2.89449  |
| Al   | 6d   | 0.25000  | 0.00000 | 0.50000  |
| Si   | 6c   | 0.25000  | 0.50000 | 0.00000  |
| O1   | 24i  | -3.34075 | 2.40743 | -8.76585 |
| O2   | 2a   | 0.00000  | 0.00000 | 0.00000  |
| Eu   | 8e   | 2.89449  | 2.89449 | 2.89449  |

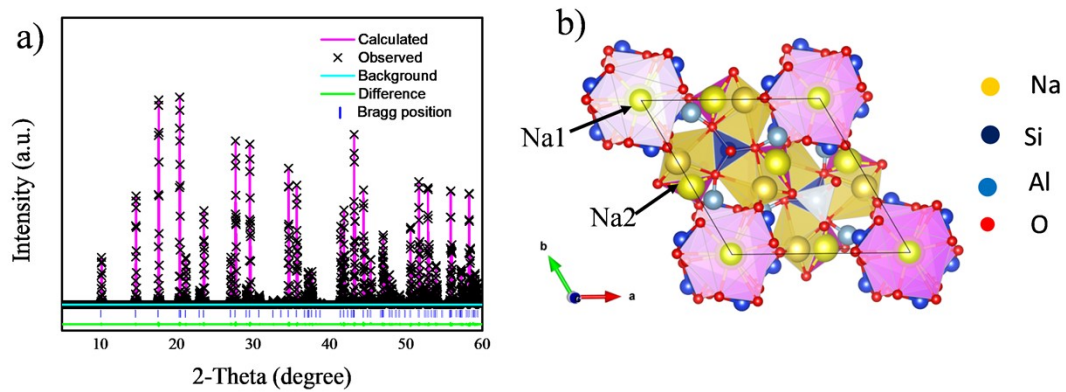

Figure S3. (a) XRD profile for Rietveld refinement of  $\text{Eu}^{2+}$ -SOD-900 phosphor. (b) Schematic crystal structure of  $\text{Eu}^{2+}$ -SOD-900 phosphor.

Table S4. Fractional Atomic Coordinates of Eu<sup>2+</sup>-SOD-900 phosphor.

| Atom | Type | Site | x       | y       | z        |
|------|------|------|---------|---------|----------|
| Na   | Na1  | 2a   | 0.00000 | 0.00000 | 0.33270  |
| Si   | Si1  | 2b   | 0.33333 | 0.66667 | 0.741285 |
| Al   | Al1  | 2b   | 0.33333 | 0.66667 | 0.087217 |
| O    | O1   | 2b   | 0.33333 | 0.66667 | -0.04479 |
| Na   | Na2  | 6c   | 0.01099 | 0.40062 | 1.28319  |
| Si   | Si2  | 6c   | 0.09504 | 0.31803 | 0.30584  |
| Al   | Al2  | 6c   | 0.09163 | 0.34470 | 0.64655  |
| O    | O2   | 6c   | 0.00600 | 0.30632 | 0.40936  |
| O    | O3   | 6c   | 0.18513 | 0.50786 | 0.66412  |
| O    | O4   | 6c   | 0.16750 | 0.54676 | 0.18804  |
| O    | O5   | 6c   | 0.22599 | 0.27103 | -0.14787 |
| O    | O6   | 6c   | 0.20524 | 0.27305 | 0.41059  |
| Eu   | Eu   | 6c   | 0.01099 | 0.40062 | 1.28319  |



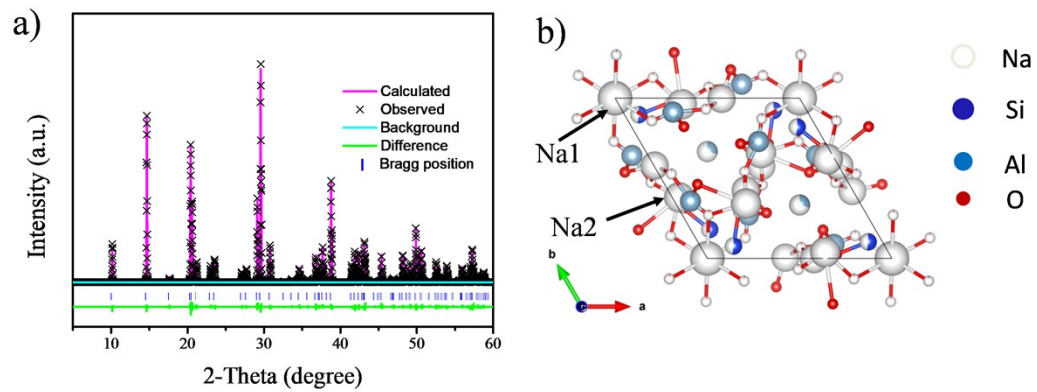

Figure S4. (a) XRD profile for Rietveld refinement of  $\text{Eu}^{2+}$ -SOD-1000 phosphor. (b) Schematic crystal structure of  $\text{Eu}^{2+}$ -SOD-1000 phosphor.

Table S5. Fractional Atomic Coordinates of Eu<sup>2+</sup>-SOD-1000 phosphor.

| Atom | Type | Site | x        | y        | z        |
|------|------|------|----------|----------|----------|
| Na   | Na1  | 2a   | 0.00000  | 0.00000  | 0.13842  |
| Si   | Si1  | 2b   | 0.33333  | 0.66667  | 1.08536  |
| Al   | Al1  | 2b   | 0.33333  | 0.66667  | 0.47727  |
| O    | O1   | 2b   | 0.33333  | 0.66667  | 0.32781  |
| Na   | Na2  | 6c   | -0.00464 | 0.42041  | 0.05996  |
| Si   | Si2  | 6c   | 0.10323  | 0.18036  | 0.38315  |
| Al   | Al2  | 6c   | 0.08727  | 0.35760  | 0.80284  |
| O    | O2   | 6c   | -0.12823 | 0.14163  | 0.29797  |
| O    | O3   | 6c   | 0.17802  | 0.46241  | 0.94348  |
| O    | O4   | 6c   | 9.99999  | -9.99999 | -1.33891 |
| O    | O5   | 6c   | 0.02598  | 0.31234  | 0.39028  |
| O    | O6   | 6c   | 0.06884  | -0.47316 | 0.78229  |
| Eu   | Eu   | 6c   | -0.00464 | 0.42041  | 0.05996  |

Table S6. Fractional Atomic Coordinates of Eu<sup>2+</sup>-SOD-1100 phosphor.

| Atom | Type | Site | x        | y        | z        |
|------|------|------|----------|----------|----------|
| Na   | Na1  | 2a   | 0.00000  | 0.00000  | 0.01032  |
| Si   | Si1  | 2b   | 0.33333  | 0.66667  | 0.88484  |
| Al   | Al1  | 2b   | 0.33333  | 0.66667  | 0.34929  |
| O    | O1   | 2b   | 0.33333  | 0.66667  | 0.09292  |
| Na   | Na2  | 6c   | -0.00603 | 0.38997  | -0.00717 |
| Si   | Si2  | 6c   | 0.09142  | 0.31279  | 0.32251  |
| Al   | Al2  | 6c   | 0.07796  | 0.32447  | 0.72111  |
| O    | O2   | 6c   | 0.01390  | 0.29801  | 0.55176  |
| O    | O3   | 6c   | 0.13816  | 0.44600  | 0.80512  |
| O    | O4   | 6c   | 0.20350  | 0.53587  | 0.26411  |
| O    | O5   | 6c   | 0.21529  | 0.28323  | 0.01456  |
| O    | O6   | 6c   | 0.37854  | -0.65419 | 0.45671  |
| Eu   | Eu   | 6c   | -0.00603 | 0.38997  | -0.00717 |

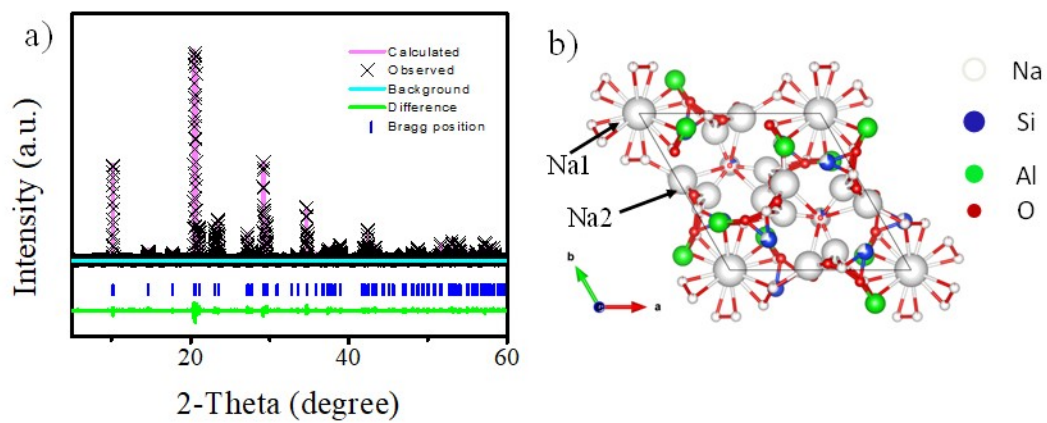

Figure S5. (a) XRD profile for Rietveld refinement of  $\text{Eu}^{2+}$ -SOD-1200 phosphor. (b) Schematic crystal structure of  $\text{Eu}^{2+}$ -SOD-1200 phosphor.

Table S7. Fractional Atomic Coordinates of Eu<sup>2+</sup>-SOD-1200 phosphor.

| Atom | Type | Site | x        | y       | z        |
|------|------|------|----------|---------|----------|
| Na   | Na1  | 2a   | 0.00000  | 0.00000 | 0.10606  |
| Si   | Si1  | 2b   | 0.33333  | 0.66667 | 1.19495  |
| Al   | Al1  | 2b   | 0.33333  | 0.66667 | 0.15194  |
| O    | O1   | 2b   | 0.33333  | 0.66667 | 0.21868  |
| Na   | Na2  | 6c   | 0.36236  | 0.88660 | -0.78233 |
| Si   | Si2  | 6c   | 0.11755  | 0.31169 | 0.42189  |
| Al   | Al2  | 6c   | 0.09118  | 0.30412 | 0.77021  |
| O    | O2   | 6c   | -0.07416 | 0.24454 | 0.40135  |
| O    | O3   | 6c   | -9.88581 | 1.29612 | 0.76587  |
| O    | O4   | 6c   | 0.04055  | 0.47933 | 0.44808  |
| O    | O5   | 6c   | 0.38976  | 0.37542 | -0.00369 |
| O    | O6   | 6c   | 0.22449  | 0.29766 | 0.63759  |
| Eu   | Eu   | 6c   | 0.36236  | 0.88660 | -0.78233 |

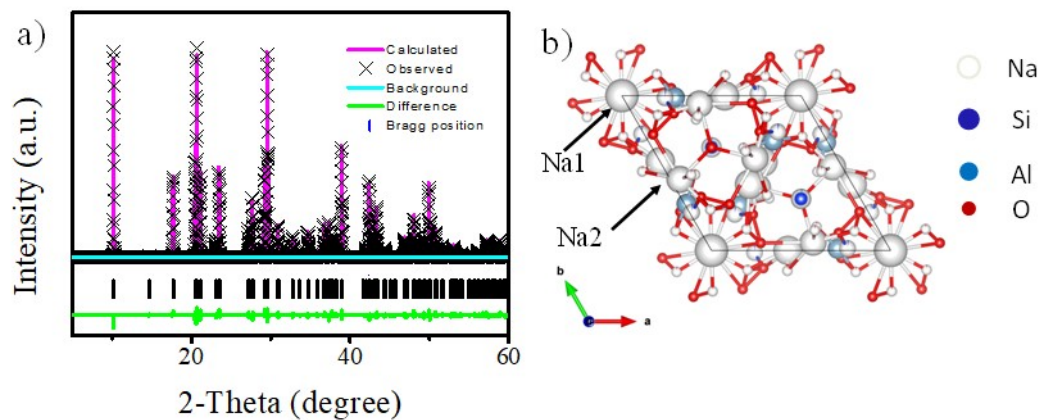

Figure S6. (a) XRD profile for Rietveld refinement of  $\text{Eu}^{2+}$ -SOD-1300 phosphor. (b) Schematic crystal structure of  $\text{Eu}^{2+}$ -SOD-1300 phosphor.

Table S8. Fractional Atomic Coordinates of Eu<sup>2+</sup>-SOD-1300 phosphor.

| Atom | Type | Site | x        | y       | z        |
|------|------|------|----------|---------|----------|
| Na   | Na1  | 2a   | 0.00000  | 0.00000 | -0.37177 |
| Si   | Si1  | 2b   | 0.33333  | 0.66667 | 1.40375  |
| Al   | Al1  | 2b   | 0.33333  | 0.66667 | 0.38582  |
| O    | O1   | 2b   | 0.33333  | 0.66667 | 0.04909  |
| Na   | Na2  | 6c   | 0.05375  | 0.45939 | -1.04383 |
| Si   | Si2  | 6c   | 0.24690  | 0.23384 | 0.30793  |
| Al   | Al2  | 6c   | 0.01159  | 0.30091 | 0.65227  |
| O    | O2   | 6c   | -0.04862 | 0.25015 | 0.47537  |
| O    | O3   | 6c   | 0.15317  | 0.49070 | 0.74674  |
| O    | O4   | 6c   | 0.13080  | 0.48913 | 0.22751  |
| O    | O5   | 6c   | 0.34623  | 0.23206 | 0.44481  |
| O    | O6   | 6c   | 0.12540  | 0.26356 | 1.06565  |
| Eu   | Eu   | 6c   | 0.05375  | 0.45939 | -1.04383 |

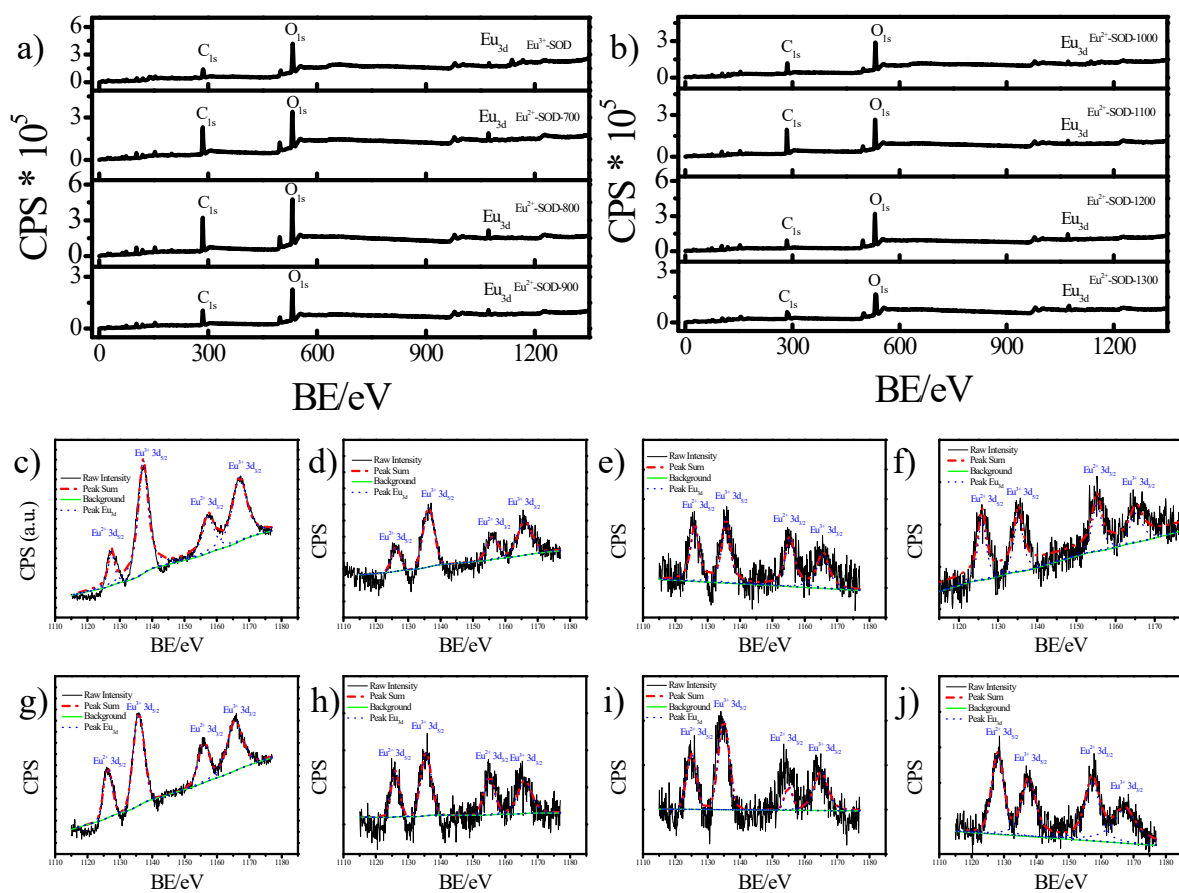

**Figure S7. (a,b)** XPS survey spectra of Eu<sup>3+</sup>-SOD and Eu<sup>2+</sup>-SOD-x (x = 700, 800, 900, 1000, 1100, 1200, 1300). (c~j) Eu 3d<sub>5/2</sub> and Eu 3d<sub>3/2</sub> core level spectra of of Eu<sup>3+</sup>-SOD and Eu<sup>2+</sup>-SOD-x (x = 700, 800, 900, 1000, 1100, 1200, 1300).



Table S9. Peak area analysis of the XPS results.

| Phosphors                  | Relative Peak Area (%) |                  | Eu <sup>2+</sup> / Eu <sup>3+</sup> |
|----------------------------|------------------------|------------------|-------------------------------------|
|                            | Eu <sup>2+</sup>       | Eu <sup>3+</sup> |                                     |
| Eu <sup>3+</sup> -SOD      | 40.98                  | 59.12            | 0.69                                |
| Eu <sup>2+</sup> -SOD-700  | 45.97                  | 54.03            | 0.86                                |
| Eu <sup>2+</sup> -SOD-800  | 44.70                  | 55.30            | 0.81                                |
| Eu <sup>2+</sup> -SOD-900  | 48.78                  | 51.22            | 0.95                                |
| Eu <sup>2+</sup> -SOD-1000 | 59.50                  | 40.50            | 1.47                                |
| Eu <sup>2+</sup> -SOD-1100 | 47.63                  | 52.37            | 0.91                                |
| Eu <sup>2+</sup> -SOD-1200 | 51.28                  | 48.72            | 1.05                                |
| Eu <sup>2+</sup> -SOD-1300 | 54.73                  | 45.27            | 1.21                                |

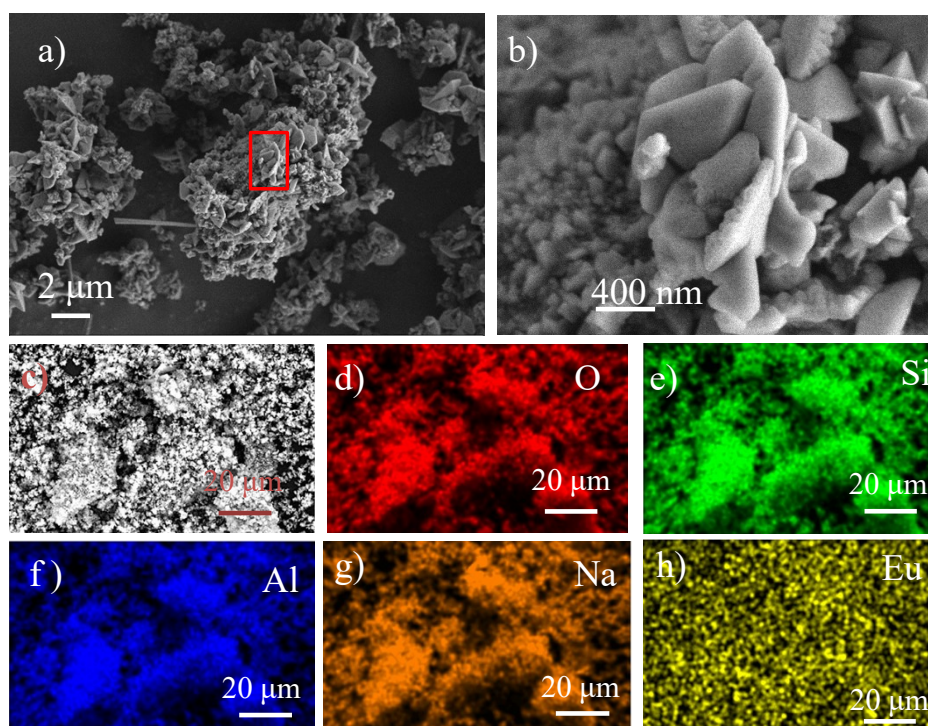

**Figure S8.** (a) (c) SEM images of Eu<sup>3+</sup>-SOD microcrystal particles and (b) an enlarged particle. (d ~ h) Element mapping images of O, Si, Al, Na, and Eu for the Eu<sup>3+</sup>-SOD particles.

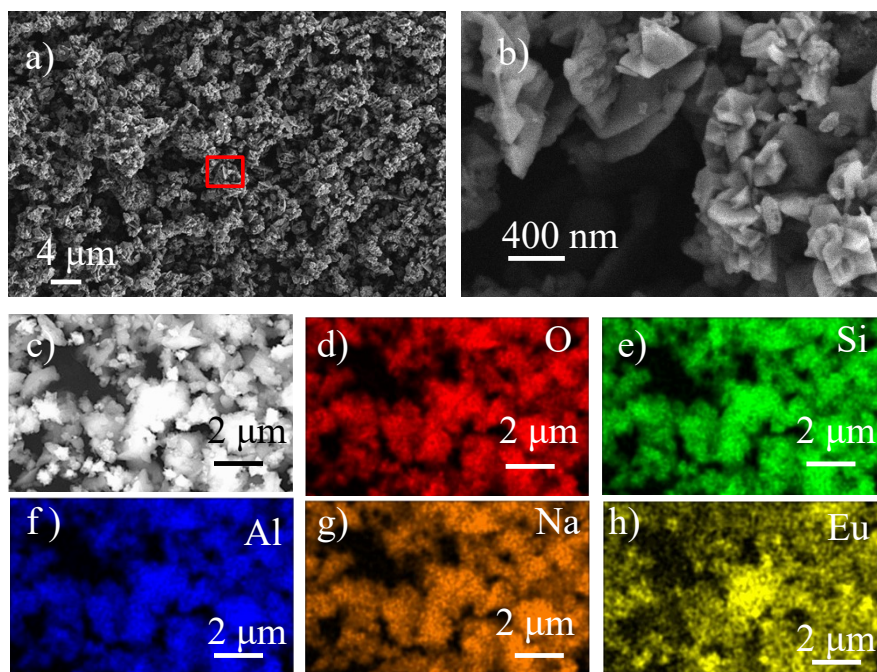

**Figure S9.** (a) (c) SEM images of  $\text{Eu}^{2+}$ -SOD-700 microcrystal particles and (b) an enlarged particle. (d ~ h) Element mapping images of O, Si, Al, Na, and Eu for the  $\text{Eu}^{2+}$ -SOD-700 particles.

**Table S10.** Elemental analysis on the Eu<sup>2+</sup>-SOD-700 phosphors.

| Atom | Weight % | Atomic % | Error % |
|------|----------|----------|---------|
| O/K  | 47.32    | 64.09    | 8.27    |
| Na/K | 10.00    | 9.43     | 1.01    |
| Al/K | 16.61    | 13.34    | 1.21    |
| Si/K | 14.98    | 11.56    | 0.99    |
| Eu/L | 11.08    | 1.58     | 0.54    |

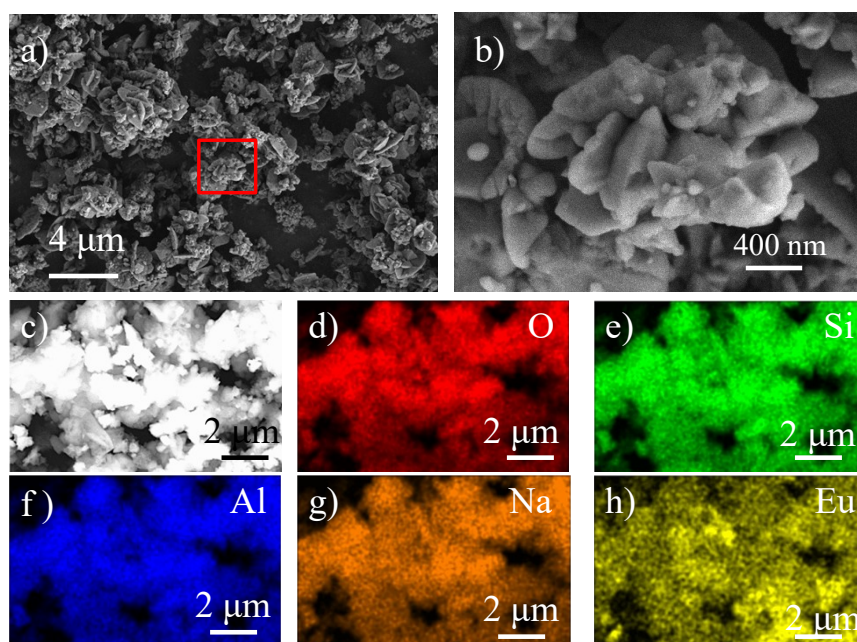

**Figure S10.** (a) (c) SEM images of Eu<sup>2+</sup>-SOD-800 microcrystal particles and (b) an enlarged particle. (d ~ h) Element mapping images of O, Si, Al, Na, and Eu for the Eu<sup>2+</sup>-SOD-800 particles.

**Table S11.** Elemental analysis on the Eu<sup>2+</sup>-SOD-800 phosphors.

| Atom | Weight % | Atomic % | Error % |
|------|----------|----------|---------|
| O/K  | 43.73    | 59.43    | 13.10   |
| Na/K | 13.80    | 13.05    | 2.29    |
| Al/K | 17.66    | 14.23    | 2.17    |
| Si/K | 15.43    | 11.95    | 1.71    |
| Eu/L | 9.37     | 1.34     | 0.76    |

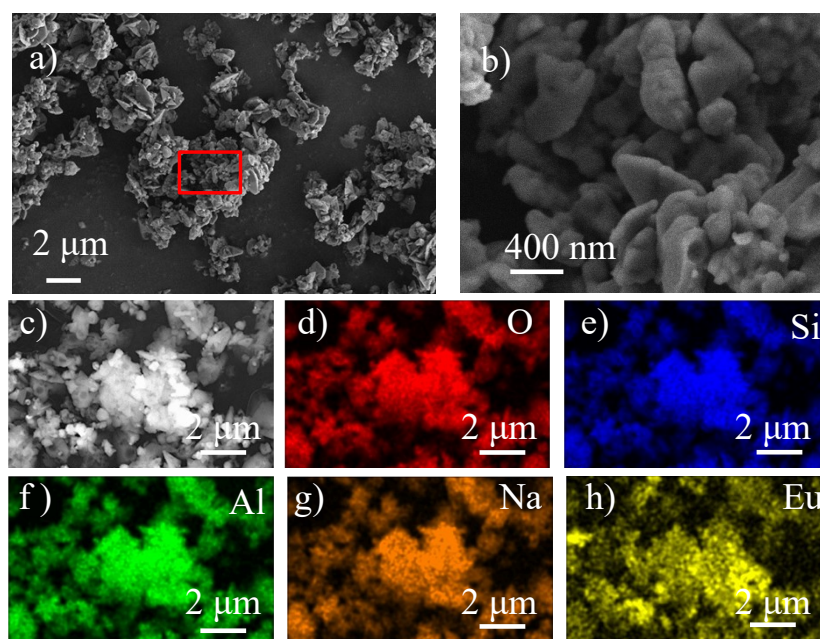

**Figure S11.** (a) (c) SEM images of Eu<sup>2+</sup>-SOD-900 microcrystal particles and (b) an enlarged particle. (d ~ h) Element mapping images of O, Si, Al, Na, and Eu for the Eu<sup>2+</sup>-SOD-900 particles.

**Table S12.** Elemental analysis on the Eu<sup>2+</sup>-SOD-900 phosphors.

| Atom | Weight % | Atomic % | Error % |
|------|----------|----------|---------|
| O/K  | 42.06    | 62.76    | 15.27   |
| Na/K | 6.41     | 6.65     | 1.34    |
| Al/K | 17.07    | 15.10    | 2.53    |
| Si/K | 14.53    | 12.35    | 1.94    |
| Eu/L | 19.94    | 3.13     | 1.72    |



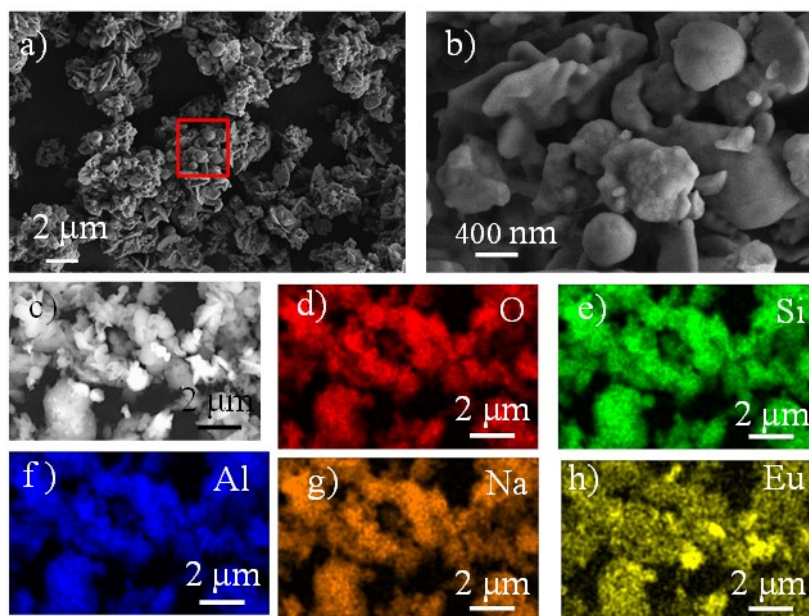

**Figure S12.** (a) (c) SEM images of  $\text{Eu}^{2+}$ -SOD-1000 microcrystal particles and (b) an enlarged particle. (d ~ h) Element mapping images of O, Si, Al, Na, and Eu for the  $\text{Eu}^{2+}$ -SOD-1000 particles.

**Table S13.** Elemental analysis on the Eu<sup>2+</sup>-SOD-1000 phosphors.

| Atom | Weight % | Atomic % | Error % |
|------|----------|----------|---------|
| O/K  | 36.73    | 56.37    | 121.82  |
| Na/K | 8.75     | 9.35     | 1.69    |
| Al/K | 18.66    | 16.98    | 2.61    |
| Si/K | 16.15    | 14.12    | 2.04    |
| Eu/L | 18.51    | 3.18     | 1.62    |

**Table S14.** Elemental analysis on the Eu<sup>2+</sup>-SOD-1100 phosphors.

| Atom | Weight % | Atomic % | Error % |
|------|----------|----------|---------|
| O/K  | 44.58    | 63.63    | 17.33   |
| Na/K | 8.26     | 8.20     | 1.82    |
| Al/K | 16.56    | 14.01    | 2.65    |
| Si/K | 14.41    | 11.72    | 2.08    |
| Eu/L | 16.19    | 2.43     | 1.55    |

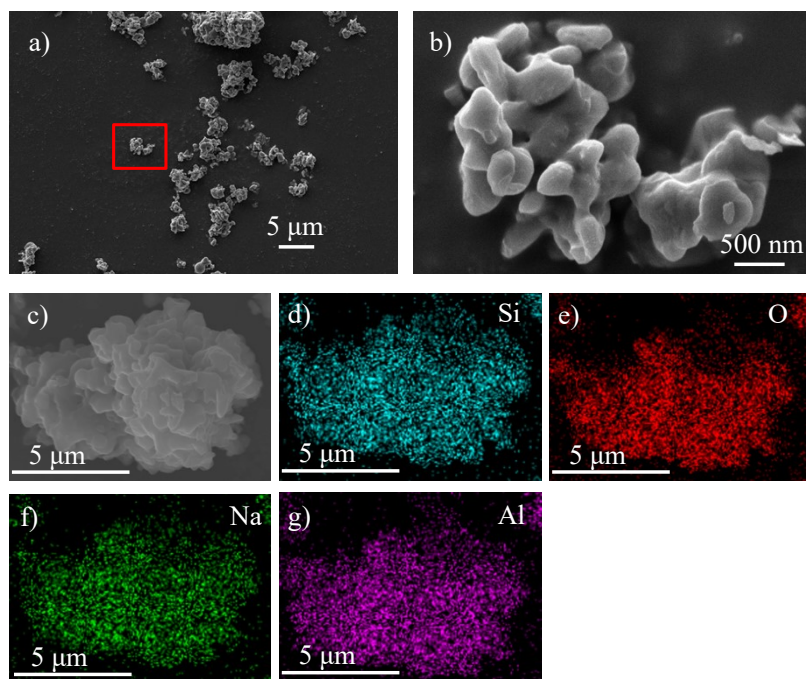

**Figure S13.** (a) (c) SEM images of  $\text{Eu}^{2+}$ -SOD-1200 microcrystal particles and (b) an enlarged particle. (d ~ g) Element mapping images of O, Si, Al and Na for the  $\text{Eu}^{2+}$ -SOD-1200 particles.

**Table S15.** Elemental analysis on the Eu<sup>2+</sup>-SOD-1200 phosphors.

| Atom | Weight % | Atomic % |
|------|----------|----------|
| O/K  | 49.75    | 61.80    |
| Na/K | 13.64    | 11.79    |
| Al/K | 17.36    | 12.79    |
| Si/K | 19.25    | 13.62    |

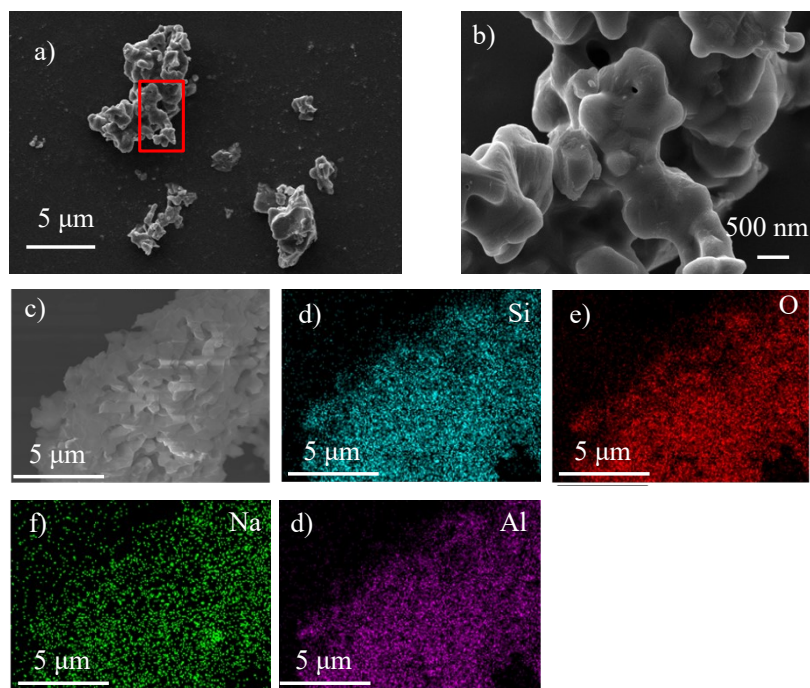

**Figure S14.** (a) (c) SEM images of  $\text{Eu}^{2+}$ -SOD-1300 microcrystal particles and (b) an enlarged particle. (d ~ g) Element mapping images of O, Si, Al and Na for the  $\text{Eu}^{2+}$ -SOD-1300 particles.

**Table S16.** The decay time and  $\chi^2$  of Eu-SOD-x (x = 700, 800, 900, 1000, 1100, 1200 and 1300) phosphors.

| Phosphor                   | Deacy time ( $\mu\text{s}$ ) | $\chi^2$ |
|----------------------------|------------------------------|----------|
| SOD-Eu <sup>2+</sup> -700  | 2.38                         | 0.993    |
| SOD-Eu <sup>2+</sup> -800  | 2.37                         | 0.992    |
| SOD-Eu <sup>2+</sup> -900  | 3.00                         | 0.997    |
| SOD-Eu <sup>2+</sup> -1000 | 3.38                         | 0.998    |
| SOD-Eu <sup>2+</sup> -1100 | 3.47                         | 0.996    |
| SOD-Eu <sup>2+</sup> -1200 | 3.38                         | 0.994    |
| SOD-Eu <sup>2+</sup> -1300 | 3.27                         | 0.993    |

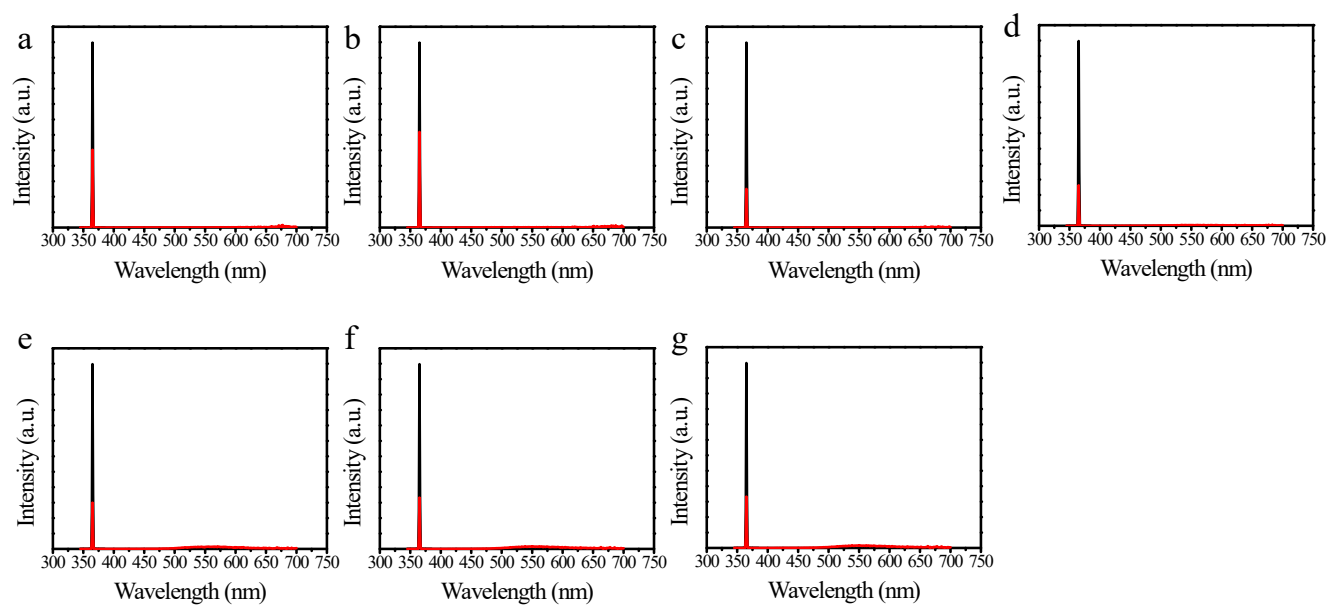

**Figure S15.** PLQY spectra of  $\text{Eu}^{2+}$ -SOD-x ((a)x = 700, (b) x = 800, (c) x = 900, (d) x = 1000, (e) x = 1100, (f) x = 1200, (g) x = 1300) phosphors .



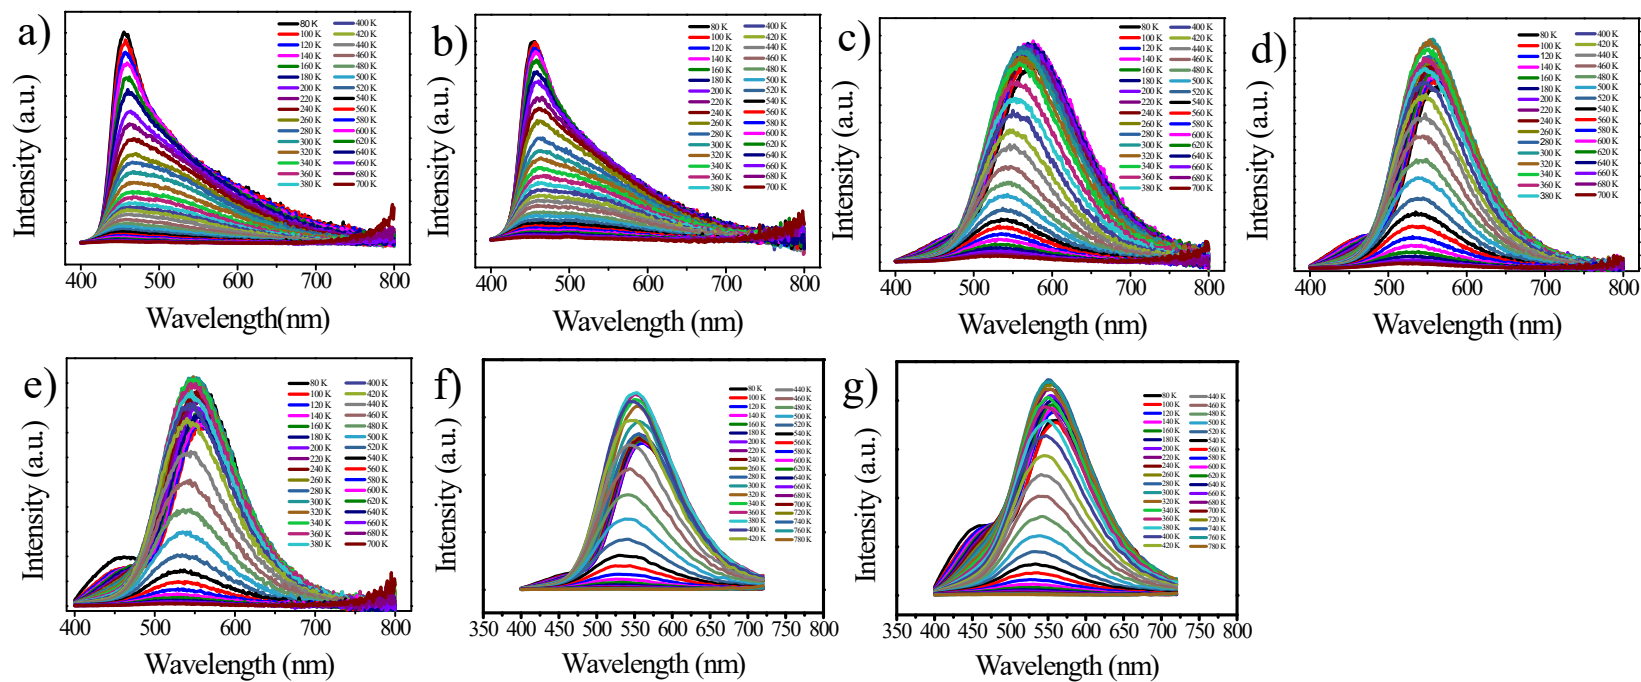

**Figure S16.** Temperature-dependent emission intensity of  $\text{Eu}^{2+}$ -SOD- $x$  ((a) $x = 700$ , (b)  $x = 800$ , (c)  $x = 900$ , (d)  $x = 1000$ , (e)  $x = 1100$ , (f)  $x = 1200$ , (g)  $x = 1300$ ) phosphors measured from 80 to 780 K using 360 nm excitation.
